# Supplementary material for: Theoretical investigation on electronic structure and second-order nonlinear optical properties of novel hexamolybdate-organoimido-(car)borane hybrid
Source: Royal Society of Chemistry journal article supplement (doi:10.1039/c2cp00054g), 2012-01-01
Supplement: c2cp00054g.pdf [file c2cp00054g.pdf]

## Supplementary Information

### Theoretical Investigation on Electronic Structure and Second-Order Nonlinear Optical Properties of Novel Hexamolybdate-Organoido-(Car)borane Hybrid

Nana Ma, Likai Yan, Wei Guan, Yongqing Qiu\* and Zhongmin Su\*

#### General Comments

- § **Table S1** Transition energy ( $\lambda$ , nm;  $E$ , eV), oscillator strength ( $f$ ), and the corresponding dominant MO transition for system **III** containing *B*-carboranyl by SAOP potential
- § **Table S2** Calculated energies of HOMO and LUMO for all systems at BP86/TZP level
- § **Table S3** Calculated frequency-dependent first hyperpolarizabilities  $\beta_{\text{vec}}$  ( $\times 10^{-30}$  esu) for all systems
- § **Fig. S1** Molecular orbitals of systems **III-2p**, **4m**, **9o** and **9m** involved in the dominant electron transitions. The black arrow represents the maximum absorption peak, red arrow for the absorption about 360 nm, and blue arrow for the absorption about 350 nm (the short line across the black arrow means the repetitive transition).
- § **Fig. S2** Molecular orbitals of systems **III-2m**, **3o** and **4o** involved in the dominant electron transitions. The black arrow represents the maximum absorption peak, red arrow for the absorption about 360 nm, and blue arrow for the absorption about 350 nm (the short line across the black arrow means the repetitive transition).
- § **Fig. S3** Total and partial density of states (TDOS and PDOS) around the HOMO-LUMO gap for all systems

---

Institute of Functional Material Chemistry, Faculty of Chemistry, Northeast Normal University,  
Changchun 130024, People's Republic of China  
E-mail: qiuyq466@nenu.edu.cn, zmsu@nenu.edu.cn  
Fax: (+86) 431 85098768;

**Table S1 Transition energy ( $\lambda$ , nm;  $E$ , eV), oscillator strength ( $f$ ), and the corresponding dominant MO transition for systems III containing B-carboranyl by SAOP potential**

|               | $\lambda$ /nm | $E$ /eV | $f$    | MO transition                                                                          |
|---------------|---------------|---------|--------|----------------------------------------------------------------------------------------|
| <b>III-9m</b> | 419.9         | 2.95    | 0.2024 | 170a'→177a' (46.24%) 170a'→176a' (37.18%)<br>96a''→100a'' (10.47%)                     |
|               | 369.5         | 3.36    | 0.2084 | 170a'→177a' (24.20%) 170a'→176a' (20.43%)<br>168a'→171a' (11.87%) 94a''→98a'' (11.21%) |
|               | 355.8         | 3.48    | 0.1961 | 96a''→103a'' (73.93%)                                                                  |
| <b>III-9o</b> | 418.9         | 2.96    | 0.2154 | 90a''→100a'' (50.08%) 90a''→98a'' (40.12%)                                             |
|               | 369.1         | 3.36    | 0.2226 | 90a''→100a'' (26.63%) 90a''→98a'' (22.45%)<br>86a''→91a'' (11.54%)                     |
|               | 356.3         | 3.48    | 0.2137 | 177a'→179a' (74.31%)                                                                   |
| <b>III-4o</b> | 409.1         | 3.03    | 0.2293 | 267a→283a (48.49%) 267a→279a (40.31%)                                                  |
|               | 364.8         | 3.40    | 0.1622 | 267a→283a (25.64%) 267a→279a (17.46%)<br>258a→279a (16.04%) 265a→275a (11.64%)         |
|               | 354.4         | 3.50    | 0.2666 | 265a→275a (59.44%)                                                                     |
| <b>III-4m</b> | 414.0         | 3.00    | 0.2384 | 267a→283a (49.46%) 267a→280a (41.20%)                                                  |
|               | 367.5         | 3.37    | 0.2182 | 267a→283a (27.09%) 267a→280a (20.68%)                                                  |
|               | 354.7         | 3.50    | 0.2036 | 265a→275a (65.58%)                                                                     |
| <b>III-2p</b> | 416.3         | 2.98    | 0.2424 | 90a''→100a'' (47.77%) 90a''→98a'' (41.03%)                                             |
|               | 368.4         | 3.37    | 0.1979 | 90a''→100a'' (23.69%) 90a''→98a'' (18.15%)<br>84a''→92a'' (12.12%)                     |
|               | 354.8         | 3.49    | 0.1804 | 177a'→179a' (69.15%)                                                                   |
| <b>III-2m</b> | 403.1         | 3.08    | 0.1396 | 89a''→98a'' (35.87%) 90a''→100a'' (22.98%)                                             |
|               | 402.0         | 3.08    | 0.1231 | 90a''→98a'' (18.90%)                                                                   |
|               | 362.3         | 3.42    | 0.1562 | 90a''→100a'' (33.47%) 177a'→179a' (22.32%)<br>90a''→98a'' (15.21%)                     |
|               | 352.9         | 3.51    | 0.1802 | 177a'→179a' (25.52%) 88a''→94a'' (18.36%)                                              |
| <b>III-3o</b> | 406.1         | 3.05    | 0.2526 | 90a''→100a'' (43.68%) 90a''→98a'' (35.47%)                                             |
|               | 364.8         | 3.40    | 0.2090 | 90a''→100a'' (32.16%) 90a''→98a'' (18.12%)<br>177a'→179a' (10.12%)                     |
|               | 354.0         | 3.50    | 0.2244 | 177a'→179a' (56.82%)                                                                   |

**Table S2** Calculated energies of HOMO and LUMO for all systems at BP86/TZP level

| systems       | HOMO (eV) | LUMO (eV) |
|---------------|-----------|-----------|
| <b>I</b>      | -5.582    | -4.125    |
| <b>II</b>     | -5.179    | -4.032    |
| <b>III-1o</b> | -5.699    | -4.147    |
| <b>III-1m</b> | -5.662    | -4.138    |
| <b>III-1p</b> | -5.652    | -4.138    |
| <b>III-9m</b> | -5.507    | -4.121    |
| <b>III-9o</b> | -5.503    | -4.119    |
| <b>III-4o</b> | -5.590    | -4.128    |
| <b>III-4m</b> | -5.558    | -4.126    |
| <b>III-3o</b> | -5.626    | -4.137    |
| <b>III-2m</b> | -5.648    | -4.135    |
| <b>III-2p</b> | -5.547    | -4.123    |

**Table S3** Calculated frequency-dependent first hyperpolarizabilities  $\beta_{\text{vec}}$  ( $\times 10^{-30}$  esu) for all systems

| systems       | 1064 nm              |                       |                     | 1340 nm              |                       |                     | 1910 nm              |                       |                     |
|---------------|----------------------|-----------------------|---------------------|----------------------|-----------------------|---------------------|----------------------|-----------------------|---------------------|
|               | $\beta_{\text{SHG}}$ | $\beta_{\text{EOPE}}$ | $\beta_{\text{OR}}$ | $\beta_{\text{SHG}}$ | $\beta_{\text{EOPE}}$ | $\beta_{\text{OR}}$ | $\beta_{\text{SHG}}$ | $\beta_{\text{EOPE}}$ | $\beta_{\text{OR}}$ |
| <b>I</b>      | -369.5               | 35.2                  | 35.2                | 62.6                 | 28.5                  | 28.5                | 34.1                 | 24.5                  | 24.5                |
| <b>II</b>     | -215.5               | -368.2                | -368.2              | 4270.6               | -335.3                | -335.3              | -301.3               | -201.7                | -201.7              |
| <b>III-1o</b> | -953.8               | 55.6                  | 55.6                | 96.8                 | 45.5                  | 45.5                | 53.8                 | 39.2                  | 39.2                |
| <b>III-1m</b> | -713.2               | 63.1                  | 63.1                | 113.2                | 51.5                  | 51.5                | 61.1                 | 44.3                  | 44.3                |
| <b>III-1p</b> | -671.5               | 66.5                  | 66.5                | 121.1                | 54.1                  | 54.1                | 64.5                 | 46.5                  | 46.5                |
| <b>III-9m</b> | -221.0               | 101.7                 | 101.7               | 222.9                | 79.6                  | 79.6                | 74.8                 | 72.9                  | 72.9                |
| <b>III-9o</b> | -227.7               | 93.4                  | 93.4                | 204.0                | 73.0                  | 73.0                | 86.6                 | 61.7                  | 61.7                |
| <b>III-4o</b> | -328.3               | 62.8                  | 62.8                | 124.9                | 50.3                  | 50.3                | 61.1                 | 42.8                  | 42.8                |
| <b>III-4m</b> | -282.0               | 85.7                  | 85.7                | 171.9                | 68.4                  | 68.4                | 126.0                | 58.3                  | 58.3                |
| <b>III-3o</b> | -469.1               | 65.0                  | 65.0                | 63.0                 | 44.8                  | 44.8                | 63.0                 | 44.8                  | 44.8                |
| <b>III-2m</b> | -755.9               | 59.3                  | 59.3                | 108.8                | 47.8                  | 47.8                | 57.4                 | 40.7                  | 40.7                |
| <b>III-2p</b> | -275.2               | 100.1                 | 100.1               | 203.1                | 79.3                  | 79.3                | 92.5                 | 67.4                  | 67.4                |

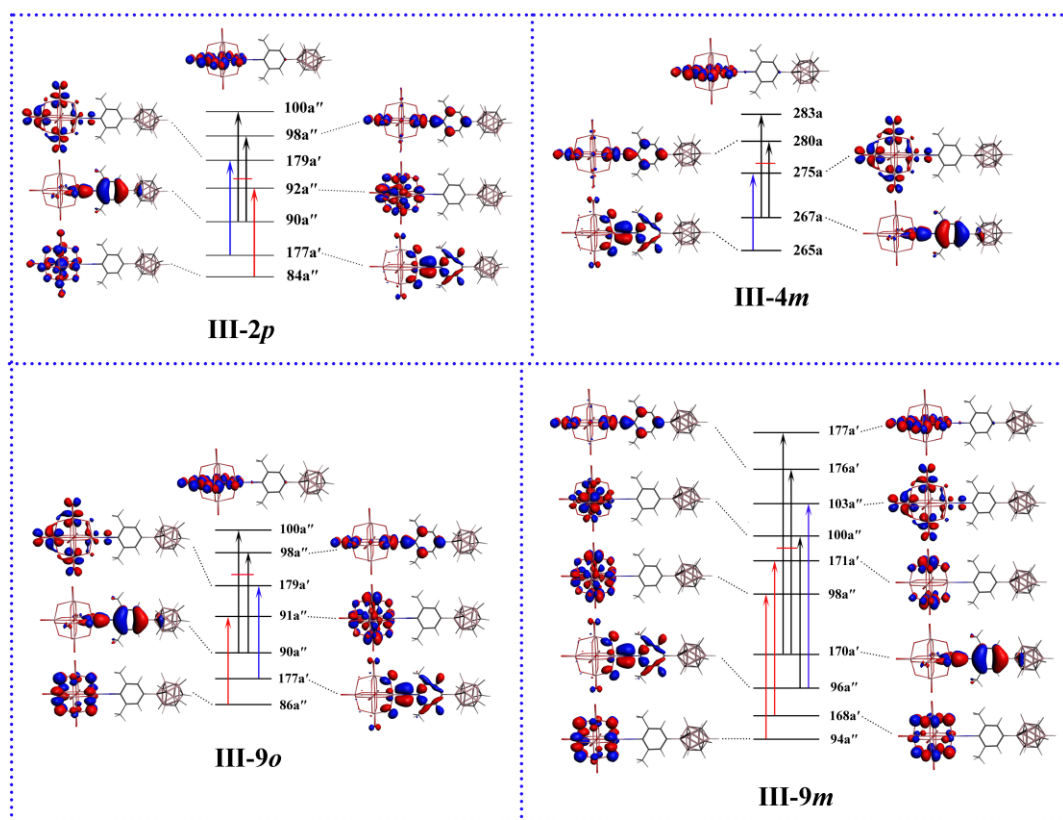

**Fig. S1** Molecular orbitals of systems **III-2p**, **4m**, **9o** and **9m** involved in the dominant electron transitions. The black arrow represents the maximum absorption peak, red arrow for the absorption about 360 nm, and blue arrow for the absorption about 350 nm (the short line across the black arrow means the repetitive transition).

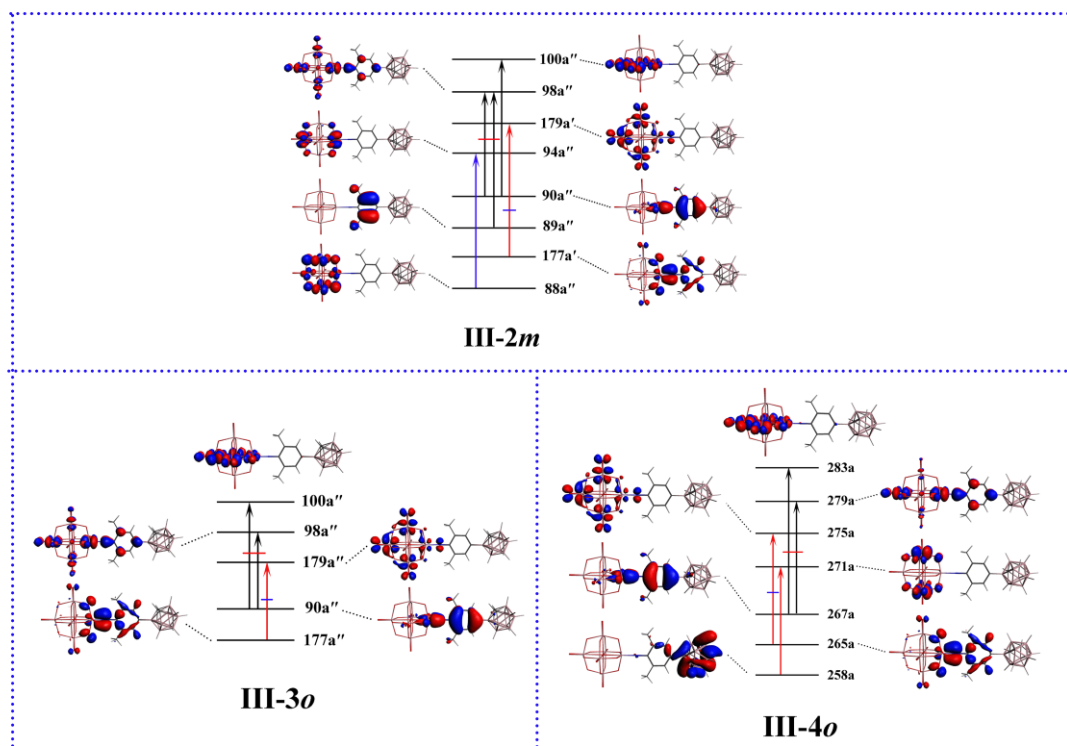

**Fig. S2** Molecular orbitals of systems **III-2m**, **3o** and **4o** involved in the dominant electron transitions. The black arrow represents the maximum absorption peak, red arrow for the absorption about 360 nm, and blue arrow for the absorption about 350 nm (the short line across the black arrow means the repetitive transition).

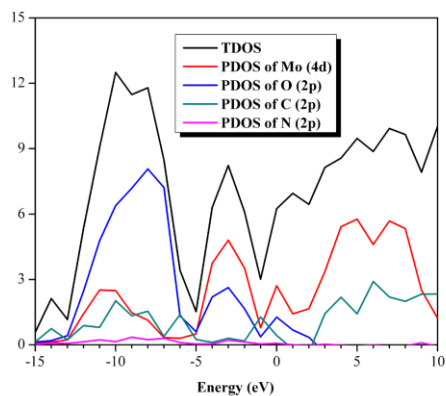

**1 (system I)**

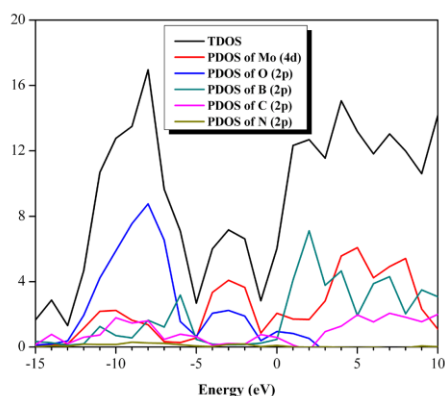

**2 (system II)**

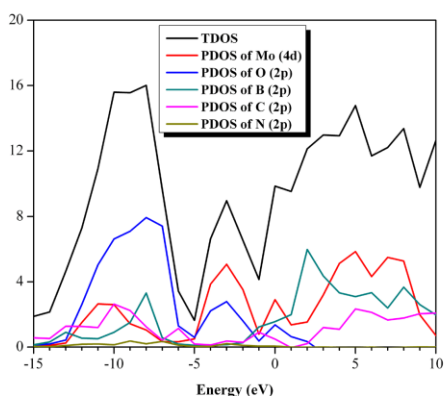

**3 (system III-1o)**

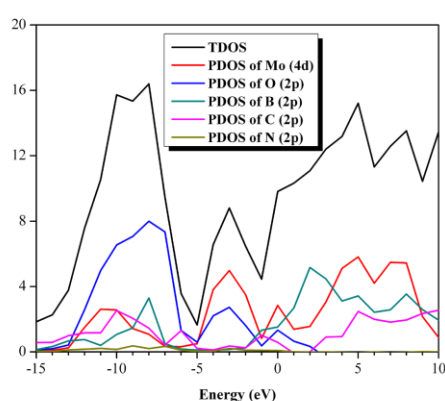

**4 (system III-1m)**

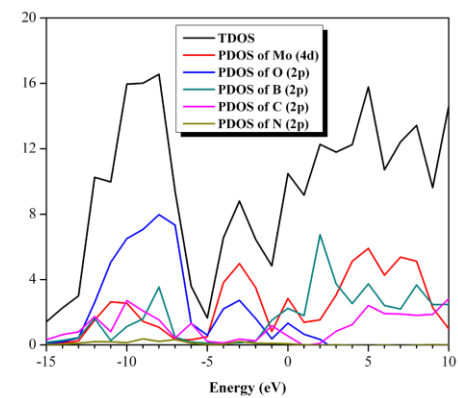

**5 (system III-1p)**

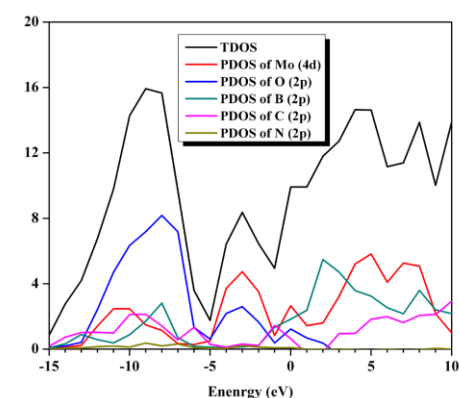

**6 (system III-9o)**

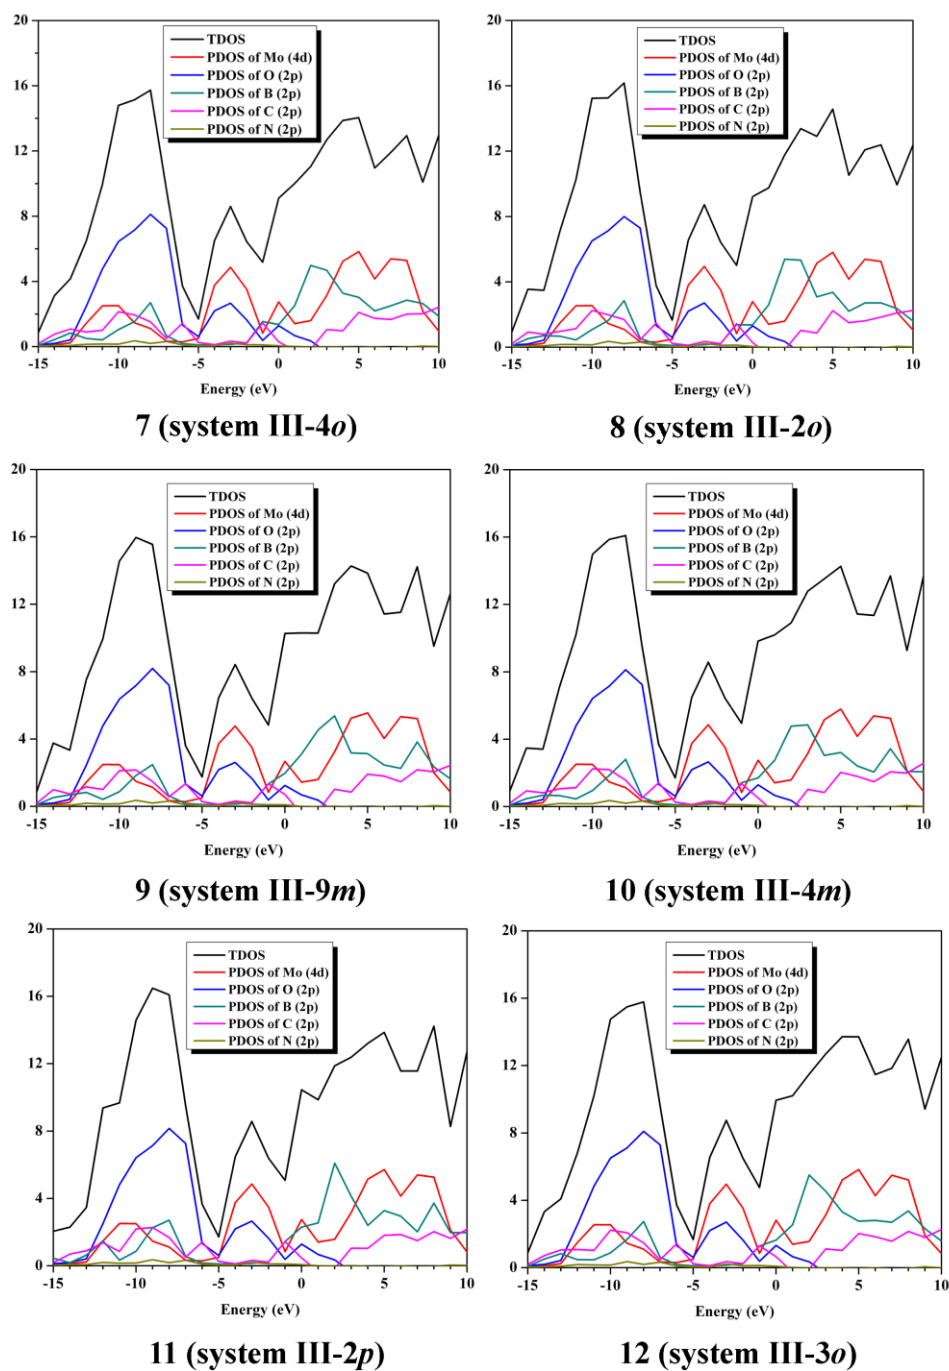

**Fig. S3** Total and partial density of states (TDOS and PDOS) around the HOMO-LUMO gap for all systems
